# Supplementary material for: The New Human Babesia sp. FR1 Is a European Member of the Babesia sp. MO1 Clade
Source: MDPI journal article supplement (doi:10.3390/pathogens10111433), 2021-11-04
Supplement: s1 [file s1]

Table S1

Description of *B. divergens* (A) and *B. capreoli* (B) clonal lines used in the study and Genbank accession numbers (new accession numbers are indicated in red).

A

| Clonal line | French county origin | Host and isolation year | Gene accession numbers  |              |                             |
|-------------|----------------------|-------------------------|-------------------------|--------------|-----------------------------|
|             |                      |                         | 18S rRNA <sup>(1)</sup> | <i>rap-1</i> | <i>ama-1</i> <sup>(2)</sup> |
| Rouen 87 F5 | Seine-Maritime       | Human - 1987            | FJ944822                | HQ538430     | MZ836245                    |
| 1406B F10   | Calvados             | Bovine                  |                         | HQ538419     |                             |
| 1505B F14   | Cantal               |                         |                         | HQ538420     |                             |
| 1705A G10   | Charente-Maritime    |                         |                         | HQ538421     | MZ836244                    |
| 1802A G8    | Cher                 | 1988                    | FJ944825                | HQ538422     |                             |
| 2705A E11   | Eure                 |                         |                         | HQ538423     |                             |
| 3601B E2    | Indre                |                         |                         | HQ538424     |                             |
| 4201B D4    | Loire                | (n=11)                  |                         | HQ538425     |                             |
| 4903A D11   | Maine et Loire       |                         |                         | HQ538426     |                             |
| 5012A G3    | Manche               |                         |                         | HQ538427     |                             |
| 7904A G11   | Deux-Sèvres          |                         |                         | HQ538428     |                             |
| 8706A E8    | Haute-Vienne         |                         |                         | HQ538429     |                             |

B

| Isolate or clones | French county origin | Isolation year | Gene accession numbers  |                |                |              |
|-------------------|----------------------|----------------|-------------------------|----------------|----------------|--------------|
|                   |                      |                | 18S rRNA <sup>(3)</sup> | <i>rap-1a1</i> | <i>rap-1a2</i> | <i>ama-1</i> |
| 2704C             | Deux-Sèvres          | 2008           |                         | MZ836246       | MZ836250       | MZ836254     |
| 2770 F6           | Marne                | 2008           | FJ944827                | MZ836247       | MZ836251       | MZ836255     |
| 2801 F10          | Deux-Sèvres          | 2008           | FJ944828                | MZ836248       | MZ836252       | MZ836256     |
| CVD 08-05         | Cher                 | 2008           |                         | MZ836249       | MZ836253       | MZ836257     |

<sup>(1)</sup> 18S rRNA sequences are all identical within *B. divergens* clones.

<sup>(2)</sup> the *ama-1* sequence of clones 1505B F14 and 3601B E2 is identical to MZ836245 and the *ama-1* sequence from the other clones is identical to MZ836244.

<sup>(3)</sup> 18S rRNA sequences are all identical within *B. capreoli* clones.
