# Supplementary material for: The New Human Babesia sp. FR1 Is a European Member of the Babesia sp. MO1 Clade
Source: MDPI journal article supplement (doi:10.3390/pathogens10111433), 2021-11-04
Supplement: s1 [file s1]

**Figure S1.** (A) Major differences in *ama-1* gene and AMA-1 protein sequences. (B) Major differences in *rap-1* gene and RAP-1 protein sequences.

(A)

**18 bp acid nucleic deletion**

|                                     |                   |                                         |                                   |
|-------------------------------------|-------------------|-----------------------------------------|-----------------------------------|
|                                     | 553               | 570                                     |                                   |
|                                     |                   |                                         |                                   |
| <i>B. divergens ama-1</i>           | AACGCAAGGAATCGTGC | GGCGGCCGAGAAA                           | CTGAGATTATTCTATCGCCTGTGTCCGCA 600 |
| <i>B. capreoli ama-1</i>            | ACCGCAAGGAATCCTG  | CGGCGGCCGAGAAA                          | CTGCGATTACTCTATCGCCTGTGTCCGCA 600 |
| <i>Babesia</i> sp. FR1 <i>ama-1</i> | TACGCAAGGAATCCTG  | CGGGGGCCATAAAA                          | CTGCGATTACTCTATCGCCTGTGTCCGCA 600 |
| <i>Babesia</i> sp. AR1 <i>ama-1</i> | AACGCAAGGAAT----- | -----ACTGCGATTACTCTATCGCCTGTGTCCGCA 582 |                                   |
|                                     | *****             | **** *****                              |                                   |

**corresponding amino-acid sequence**

|                              |                      |
|------------------------------|----------------------|
| <i>B. divergens</i> AMA-1    | NARNRAAAEKTEIILSPVSA |
| <i>B. capreoli</i> AMA-1     | TARNPAAAEKTAITLSPVSA |
| <i>Babesia</i> sp. FR1 AMA-1 | YARNPAGAIKTAITLSPVSA |
| <i>Babesia</i> sp. AR1 AMA-1 | NARN-----TAITLSPVSA  |
|                              | *** * * *****        |

**36 bp acid nucleic duplication**

|                                     |                                           |                                      |      |
|-------------------------------------|-------------------------------------------|--------------------------------------|------|
|                                     |                                           | 1496                                 | 1531 |
|                                     |                                           |                                      |      |
| <i>B. divergens ama-1</i>           | TACTACTATTGCTCAGAAGAGAAGCCTTCATCCTGG----- |                                      | GC   |
| <i>B. capreoli ama-1</i>            | TACTACTATTGCTCGCAAGAGAAACCTACATCATGG----- |                                      | GC   |
| <i>Babesia</i> sp. FR1 <i>ama-1</i> | TACTACTATTGCTCGCAAGAGAAGCCTCCATCCTGG      | TACTACTATCGCTCGCAAGAGAAGCCTCCATCCTGG | GC   |
| <i>Babesia</i> sp. AR1 <i>ama-1</i> | TACTACTATTGCTCGCAAGAGAAGCCTCCATCCTGG----- |                                      | GC   |
|                                     | *****                                     | ***** **                             | **   |

**corresponding amino-acid sequence**

|                              |                         |
|------------------------------|-------------------------|
| <i>B. divergens</i> AMA-1    | YYYCSEEKPSW-----A       |
| <i>B. capreoli</i> AMA-1     | YYYCSQEKPTW-----A       |
| <i>Babesia</i> sp. FR1 AMA-1 | YYYCSQEKPPSWYYYSQEKPPSW |
| <i>Babesia</i> sp. AR1 AMA-1 | YYYCSQEKPPSW-----A      |
|                              | *****:*** ** *          |

(B)

**3 bp and 33 bp acid nucleic deletions**

|                                     |                                                               |       |       |
|-------------------------------------|---------------------------------------------------------------|-------|-------|
|                                     |                                                               | 1012  | 1014  |
|                                     |                                                               |       |       |
| <i>B. divergens rap-1</i>           | TTGTTTCAGCAAGCGTGCTCCATCYTCTTCTACTGAGGGGCCATGGCACAAGAAGGTTACT |       |       |
| <i>Babesia</i> sp. FR1 <i>rap-1</i> | TTGTTTCAGCAAGCGCCCTTCATCTTCTTCTACTGAGGGGTTCTGGAAAAAGAAGGTTACT |       |       |
| <i>Babesia</i> sp. AR1 <i>rap-1</i> | TTGTTTCAGCAAGCGCCCTTCATCTTCTTCTACTGAGGCATCCTGGAAAAAG--GTTACT  |       |       |
| <i>B. capreoli rap-1a1</i>          | TTGTTTCAGCAAGCGCCCTTCATCTACTTCTACTGAGGACTCCGAGAAAAAGRATGTTACT |       |       |
| <i>B. capreoli rap-1a2</i>          | TTGTTTCARCAAGCGCCCTTCATCTACTTCTACTGAGGRSTTCTGGAAAAAGAAGGTTACT |       |       |
|                                     | *****                                                         | ***** | ***** |

|                                     |                                                              |                    |
|-------------------------------------|--------------------------------------------------------------|--------------------|
|                                     | 1030                                                         | 1062               |
|                                     |                                                              |                    |
| <i>B. divergens rap-1</i>           | CACTCTGTG-----                                               | AAGAAGATGTTAAACGAG |
| <i>Babesia</i> sp. FR1 <i>rap-1</i> | CAACCTGTGAAGGATTATTTAAACAAGAAGATGCATGCTACTAAGCAGTTGTTTCACGAG |                    |
| <i>Babesia</i> sp. AR1 <i>rap-1</i> | CAACCTGTGAAGGATTATTTAAACAAGAAGATGCATGCTACTAAGCAGTTGTTTCACGAG |                    |
| <i>B. capreoli rap-1a1</i>          | CAACCTATGAAGGATTATTTAAACAAGAAGATGCATGCTACTAAGCAGTTGTTTCACGAG |                    |
| <i>B. capreoli rap-1a2</i>          | CAACCTATG-----                                               | AAGAAGTTGTTCCACGAG |
|                                     | ** ** *                                                      | ** * ** *          |

**corresponding amino-acid sequence**

|                              |                                     |
|------------------------------|-------------------------------------|
| <i>B. divergens</i> RAP-1    | APSSSTEGPWHKKVTHSV-----KKMLNE       |
| <i>Babesia</i> sp. FR1 RAP-1 | PSSSSTEGFWKKKVTPVKDYLNKKMHATKQLFHE  |
| <i>Babesia</i> sp. AR1 RAP-1 | PSSSSTEASW-KKVTQPVKDYLNKKMHATKQLFHE |
| <i>B. capreoli</i> RAP-1a1   | PSSTSTEDSEKKNVTQPMKDYLNKKMHATKQLFHE |
| <i>B. capreoli</i> RAP-1a2   | PSSTSTEXFWKKKVTPQM-----KKLFHE       |
